# Supplementary material for: Cardiac complications and pertaining mortality rate in COVID-19 patients; a systematic review and meta-analysis
Source: Research Square preprint supplement (doi:10.21203/rs.3.rs-122109/v1), 2020-12-21
Supplement: Supplementary file 2 [file 5b1399157c69dd2d2151716f.docx]

| **Appendix 1:** Medline search query |
| --- |
| Search terms |
| 1. “COVID-19 “[Supplementary Concept] OR ”severe acute respiratory syndrome coronavirus 2”[Supplementary Concept] OR ”COVID-19 vaccine”[Supplementary Concept] OR ”COVID-19 diagnostic testing”[Supplementary Concept] OR ”COVID-19 drug treatment”[Supplementary Concept] OR “Betacoronavirus”[mh] OR “Coronavirus Infections”[mh] OR COVID-19[tiab] OR 2019 novel coronavirus disease[tiab] OR COVID19[tiab] OR COVID-19 pandemic[tiab] OR SARS-CoV-2 infection[tiab] OR COVID-19 virus disease[tiab] OR 2019 novel coronavirus infection[tiab] OR 2019-nCoV infection[tiab] OR coronavirus disease 2019[tiab] OR coronavirus disease-19[tiab] OR 2019-nCoV disease[tiab] OR COVID-19 virus infection[tiab] OR Severe Acute Respiratory Syndrom Coronavirus 2[tiab] OR Coronavirus[tiab] OR Coronaviruses[tiab] OR severe acute respiratory syndrome coronavirus 2[tiab] OR 2019-nCoV[tiab] OR Wuhan coronavirus[tiab] OR SARS-CoV-2[tiab] OR 2019 novel coronavirus[tiab] OR COVID-19 virus[tiab] OR coronavirus disease 2019 virus[tiab] OR COVID19 virus[tiab] OR Wuhan seafood market pneumonia virus[tiab] OR Betacoronavirus[tiab] OR Betacoronaviruses[tiab] OR Coronavirus Infections[tiab] OR Coronavirus Infection[tiab] OR Infection, Coronavirus[tiab] OR Infections, Coronavirus[tiab] OR COVID-19 vaccine[tiab] OR COVID-19 diagnostic testing[tiab] OR COVID-19 drug treatment[tiab] OR coronavirus disease 2019 drug treatment[tiab] OR Covid-19 treatment[tiab] OR treatment of Covid-19 virus infection[tiab] OR coronavirus disease-19 drug treatment[tiab] 2. “Troponin”[mh] OR “Heart Injuries”[mh] OR “Myocarditis”[mh] OR “Cardiomyopathies”[mh] OR “Heart Diseases”[mh] OR “Pericarditis”[mh] OR “Cardiovascular Abnormalities”[mh] OR “Cardiovascular Infections”[mh] OR “Cardiovascular Diseases”[mh] OR “Heart Arrest”[mh] OR “Ventricular Dysfunction”[mh] OR “Heart Failure”[mh] OR “Heart Failure, Diastolic”[mh] OR “Heart Failure, Systolic”[mh] OR Heart Injuries[tiab] OR [tiab] OR Injuries, Heart[tiab] OR Heart Injury[tiab] OR Injury, Heart[tiab] OR Myocarditis[tiab] OR Myocarditides[tiab] OR Carditis[tiab] OR Cardiomyopathies[tiab] OR Cardiomyopathy[tiab] OR Myocardial Diseases[tiab] OR Disease, Myocardial[tiab] OR Diseases, Myocardial[tiab] OR Myocardial Disease[tiab] OR Myocardiopathies[tiab] OR Myocardiopathy[tiab] OR Cardiomyopathies, Secondary[tiab] OR Cardiomyopathy, Secondary[tiab] OR Secondary Cardiomyopathies[tiab] OR Secondary Cardiomyopathy[tiab] OR Secondary Myocardial Diseases[tiab] OR Disease, Secondary Myocardial[tiab] OR Diseases, Secondary Myocardial[tiab] OR Myocardial Disease, Secondary[tiab] OR Secondary Myocardial Disease[tiab] OR Myocardial Diseases, Secondary[tiab] OR Heart Diseases[tiab] OR Heart Disease[tiab] OR Cardiac Diseases[tiab] OR Cardiac Disease[tiab] OR Cardiac Disorders[tiab] OR Cardiac Disorder[tiab] OR Heart Disorders[tiab] OR Heart Disorder[tiab] OR Pericarditis[tiab] OR Pleuropericarditis[tiab] OR Endocarditis[tiab] OR Endocarditides[tiab] OR Infective Endocarditis[tiab] OR Endocarditides, Infective[tiab] OR Endocarditis, Infective[tiab] OR Infective Endocarditides[tiab] OR Heart damage[tiab] OR Cardiac injury[tiab] OR Acute cardiac injury[tiab] OR Cardiovascular Abnormalities[tiab] OR Abnormalities, Cardiovascular[tiab] OR Abnormality, Cardiovascular[tiab] OR Cardiovascular Abnormality[tiab] OR Cardiovascular Infections[tiab] OR Cardiovascular Infection[tiab] OR Infection, Cardiovascular[tiab] OR Infections, Cardiovascular[tiab] OR Cardiovascular Diseases[tiab] OR Cardiovascular Disease[tiab] OR Disease, Cardiovascular[tiab] OR Diseases, Cardiovascular[tiab] OR Heart Arrest[tiab] OR Arrest, Heart[tiab] OR Cardiac Arrest[tiab] OR Arrest, Cardiac[tiab] OR Asystole[tiab] OR Asystoles[tiab] OR Cardiopulmonary Arrest[tiab] OR Arrest, Cardiopulmonary[tiab] OR Ventricular Dysfunction[tiab] OR Dysfunction, Ventricular[tiab] OR Dysfunctions, Ventricular[tiab] OR Ventricular Dysfunctions[tiab] OR Heart Failure[tiab] OR Diastolic Heart Failures[tiab] OR Heart Failures, Diastolic[tiab] OR Diastolic Heart Failure[tiab] OR Heart Failure, Diastolic[tiab] OR Cardiac Failure[tiab] OR Heart Decompensation[tiab] OR Decompensation, Heart[tiab] OR Heart Failure, Right-Sided[tiab] OR Heart Failure, Right Sided[tiab] OR Right-Sided Heart Failure[tiab] OR Right Sided Heart Failure[tiab] OR Myocardial Failure[tiab] OR Congestive Heart Failure[tiab] OR Heart Failure, Congestive[tiab] OR Heart Failure, Left-Sided[tiab] OR Heart Failure, Left Sided[tiab] OR Left-Sided Heart Failure[tiab] OR Left Sided Heart Failure[tiab] OR Heart Failure, Systolic[tiab] OR Heart Failures, Systolic[tiab] OR Systolic Heart Failures[tiab] OR Systolic Heart Failure[tiab] OR Troponin[tiab] OR Troponins[tiab] OR Troponin Complex[tiab] 3. #1 AND #2 |
